# Supplementary material for: Berberine-styrene-co-maleic acid nanomicelles: unlocking opportunities for the treatment and prevention of bacterial infections
Source: PubMed Central journal article supplement — RSC Adv. 2024 Oct 28;14(46):34066–80. doi: 10.1039/d4ra04457f (PMC11513620; doi:10.1039/d4ra04457f), 2024-10-28
Supplement: RA-014-D4RA04457F-s001.pdf [file RA-014-D4RA04457F-s001.pdf]

## Berberine-styrene-co-maleic acid nanomicelles: unlocking opportunities for the treatment and prevention of bacterial infections

Nicola F. Virzi,<sup>a†</sup> Valentina Greco,<sup>b†</sup> Stefano Stracquadanio,<sup>c</sup> Anfal Jasim,<sup>d</sup> Khaled Greish,<sup>d</sup> Patricia Diaz-Rodriguez,<sup>e</sup> Natalie P. Rotondo,<sup>f</sup> Stefania Stefani,<sup>c</sup> Valeria Pittalà,<sup>ad\*</sup> and Alessandro Giuffrida,<sup>b</sup>

<sup>a</sup> Department of Drug and Health Science, University of Catania, 95125, Catania, Italy

<sup>b</sup> Department of Chemical Sciences, University of Catania, 95125, Catania, Italy

<sup>c</sup> Section of Microbiology, Department of Biomedical and Biotechnological Sciences (BIOMETEC), University of Catania, 95123, Catania, Italy

<sup>d</sup> Department of Molecular Medicine, Arabian Gulf University, Manama 329, Bahrain

<sup>e</sup> Departamento de Farmacología, Farmacia y Tecnología Farmacéutica, I+D Farma (GI-1645), Faculty of Pharmacy, Instituto de Materiales (iMATUS), and Health Research Institute of Santiago de Compostela (IDIS), Universidade de Santiago de Compostela, 15782 Santiago de Compostela, Spain.

<sup>f</sup> Department of Pharmacy–Pharmaceutical Sciences, University of Bari Aldo Moro 70125, Bari, Italy

\* Correspondence at Valeria Pittalà. Department of Drug and Health Science, University of Catania, Viale A. Doria 6, 95125, Catania, Italy. E-mail: [valeria.pittala@unict.it](mailto:valeria.pittala@unict.it); Phone: +390957384269

### Supporting Information:

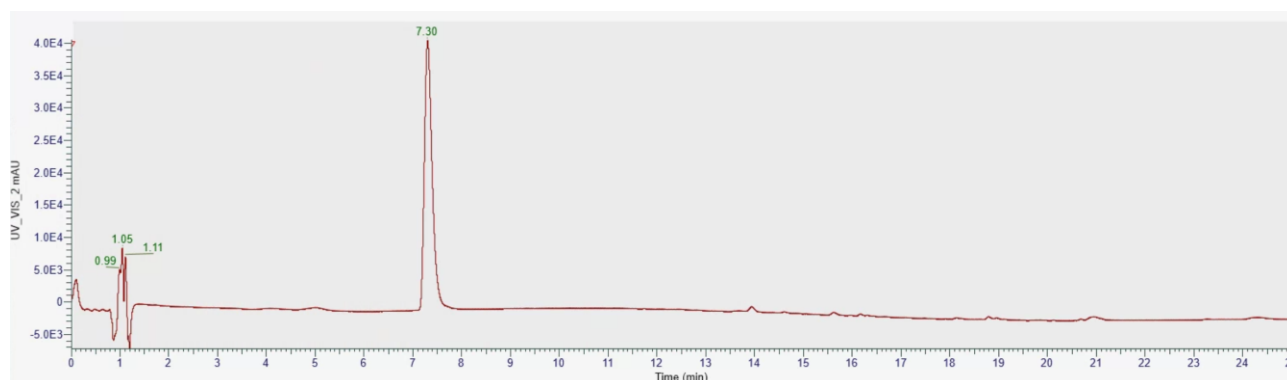

**Figure S1.** BER sample chromatogram (red line) shows BER peak at 7.3 min.

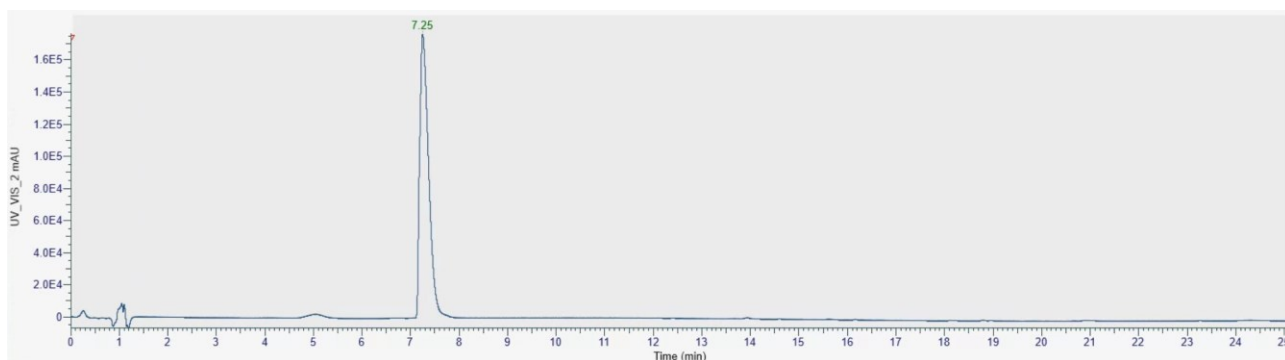

**Figure S2.** BER standard chromatogram (blue line) shows BER peak at 7.25 min.

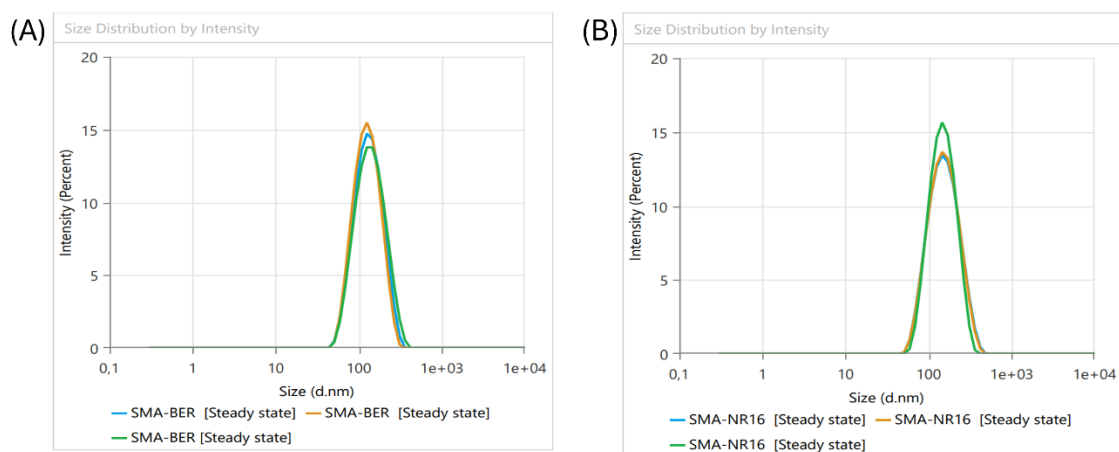

**Figure S3.** (A) SMA-BER and (B) SMA-NR16 size distribution by intensity in DDW.

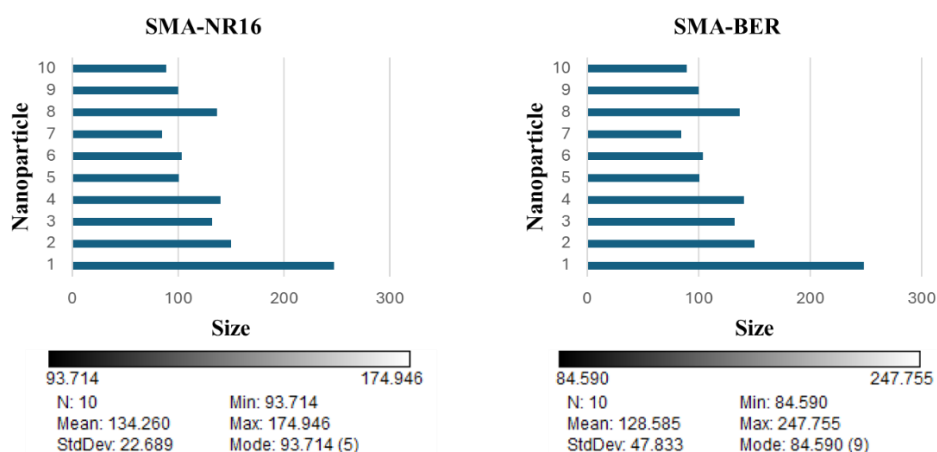

**Figure S4.** SMA-BER and SMA-NR16 size distribution analysis from TEM images. The nanoparticles dimensions were analyzed by ImageJ software.

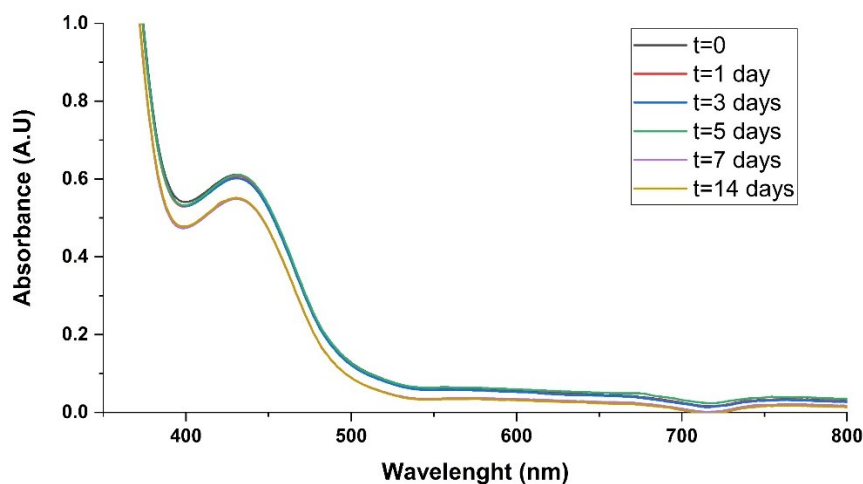

**Figure S5.** UV-Vis spectra stability studies of SMA-BER dissolved in DDW, and stored at 4 °C for 14 days. SMA-BER = 400  $\mu\text{g/mL}$ . Spectra were recorded scanning from 200 to 800 nm, using a 1 cm path length quartz cells.

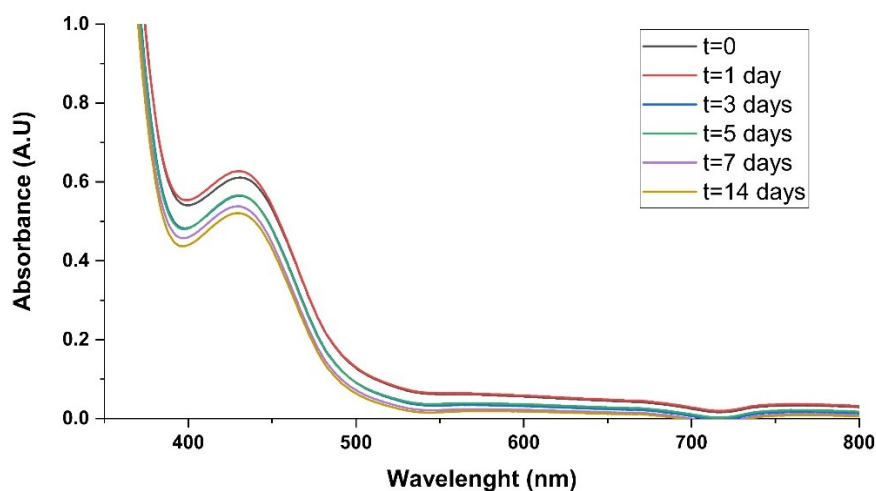

**Figure S6.** UV-Vis spectra stability studies of SMA-BER dissolved in DDW, and stored at r.t. for 14 days. SMA-BER = 400  $\mu\text{g/mL}$ . Spectra were recorded scanning from 200 to 800 nm, using a 1 cm path length quartz cells.

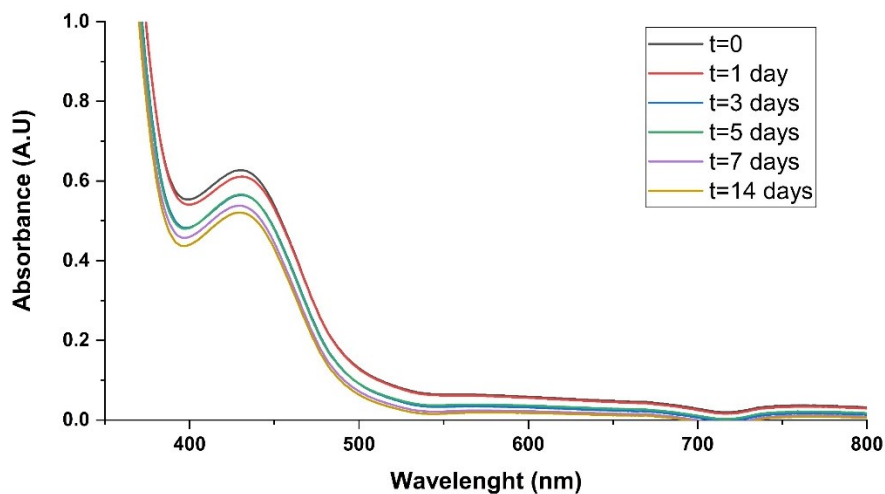

**Figure S7.** UV-Vis spectra stability studies of SMA-BER dissolved in DDW, and stored at 37 °C for 14 days. SMA-BER = 400  $\mu\text{g/mL}$ . Spectra were recorded scanning from 200 to 800 nm, using a 1 cm path length quartz cells.

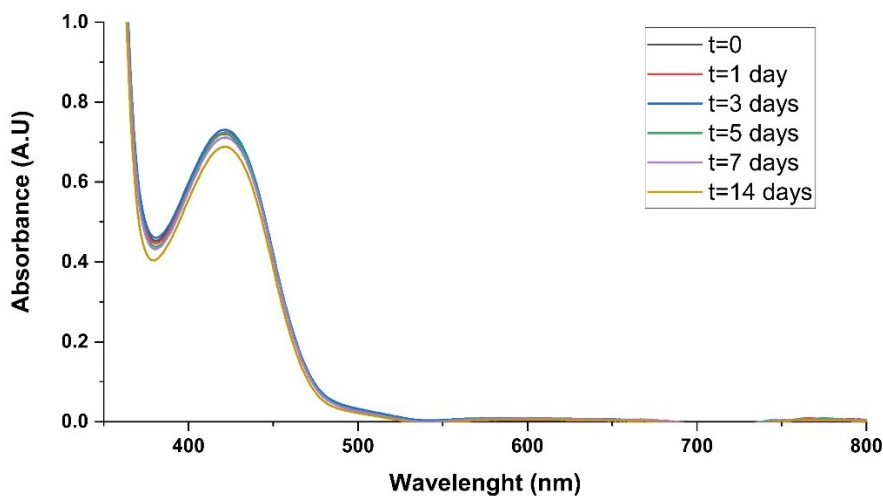

**Figure S8.** UV-Vis spectra stability studies of SMA-BER dissolved in NaCl aqueous solution, and stored at 4 °C for 14 days. SMA-BER = 400  $\mu\text{g/mL}$ . Spectra were recorded scanning from 200 to 800 nm, using a 1 cm path length quartz cells.

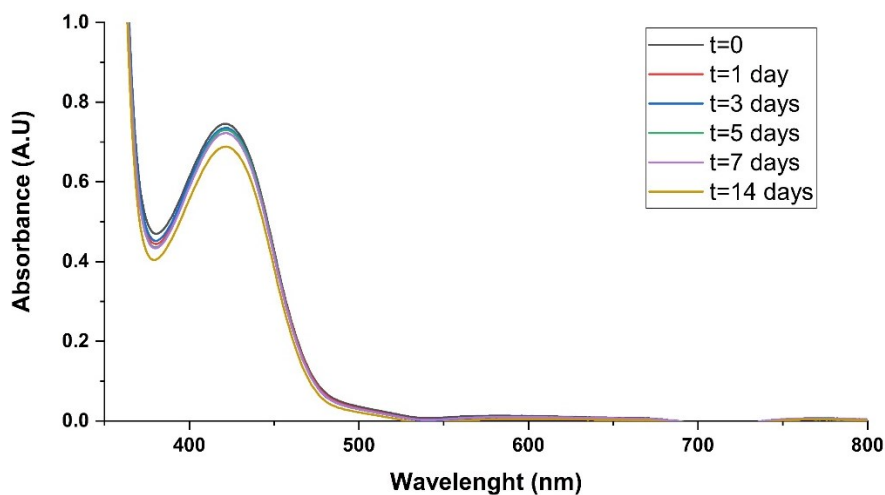

**Figure S9.** UV-Vis spectra stability studies of SMA-BER dissolved in NaCl aqueous solution, and stored at r.t. for 14 days. SMA-BER = 400  $\mu\text{g/mL}$ . Spectra were recorded scanning from 200 to 800 nm, using a 1 cm path length quartz cells.

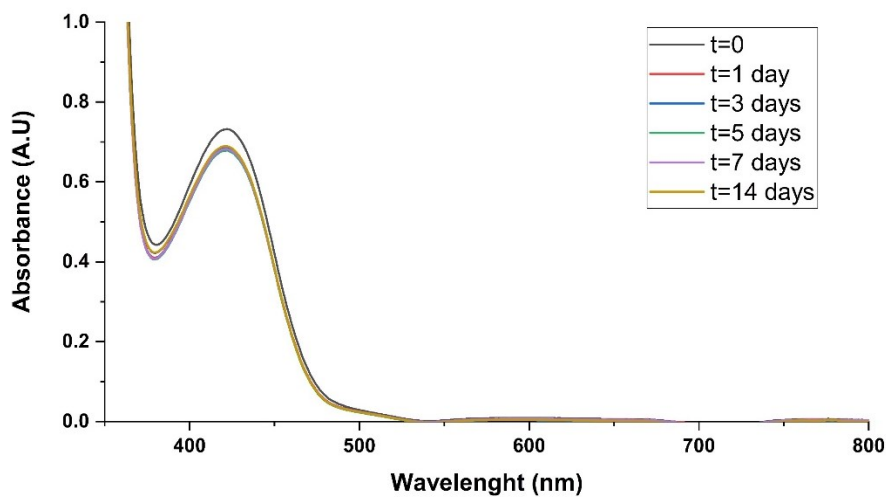

**Figure S10.** UV-Vis spectra stability studies of SMA-BER dissolved in PBS aqueous solution, and stored at 4  $^{\circ}\text{C}$  for 14 days. SMA-BER = 400  $\mu\text{g/mL}$ . Spectra were recorded scanning from 200 to 800 nm, using a 1 cm path length quartz cells.

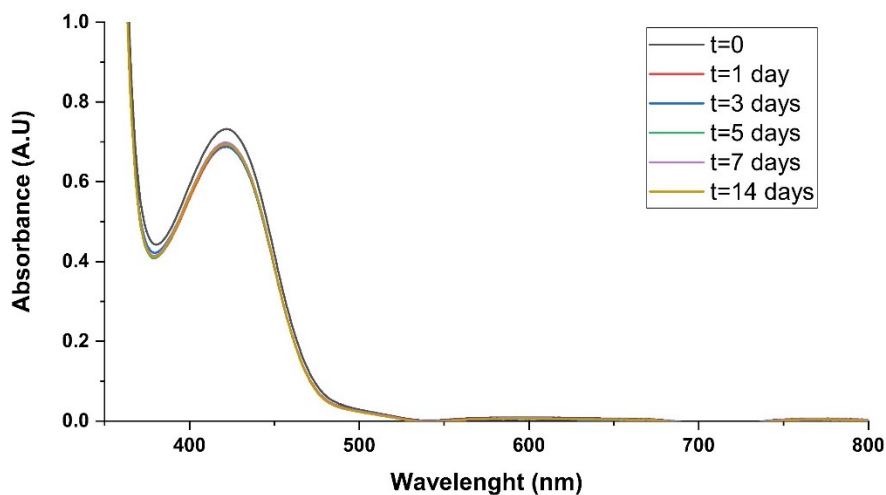

**Figure S11.** UV-Vis spectra stability studies of SMA-BER dissolved in PBS aqueous solution, and stored at r.t. for 14 days. SMA-BER = 400  $\mu\text{g/mL}$ . Spectra were recorded scanning from 200 to 800 nm, using a 1 cm path length quartz cells.

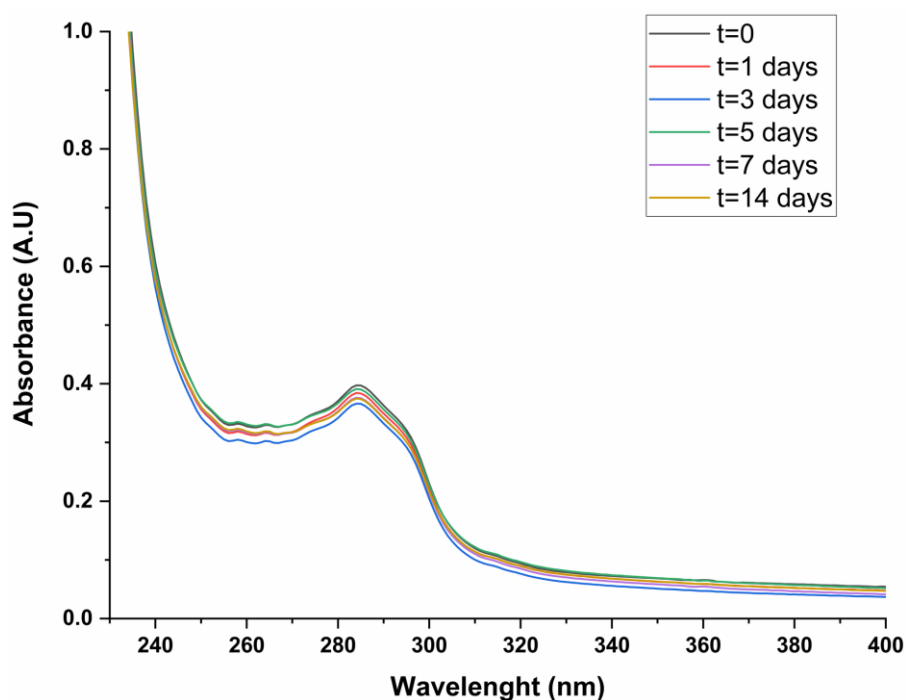

**Figure S12.** UV-Vis spectra stability studies of SMA-NR16 dissolved in DDW, and stored at 4  $^{\circ}\text{C}$  for 14 days. SMA-NR16 = 100  $\mu\text{g/mL}$ . Spectra were recorded scanning from 200 to 800 nm, using a 1 cm path length quartz cells.

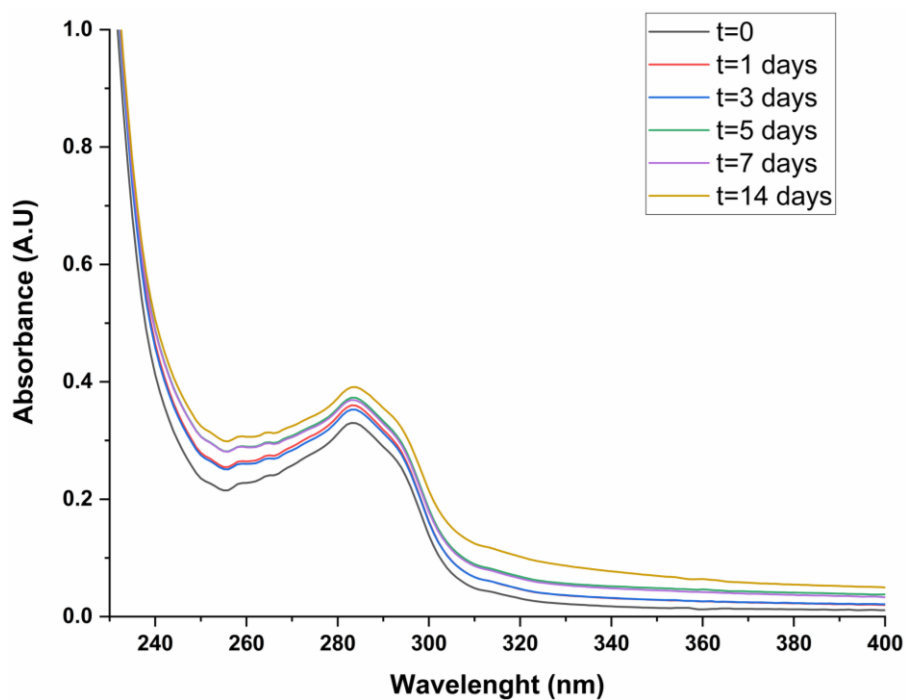

**Figure S13.** UV-Vis spectra stability studies of SMA-NR16 dissolved in NaCl aqueous solution, and stored at 4 °C for 14 days. SMA-NR16 = 100  $\mu\text{g/mL}$ . Spectra were recorded scanning from 200 to 800 nm, using a 1 cm path length quartz cells.

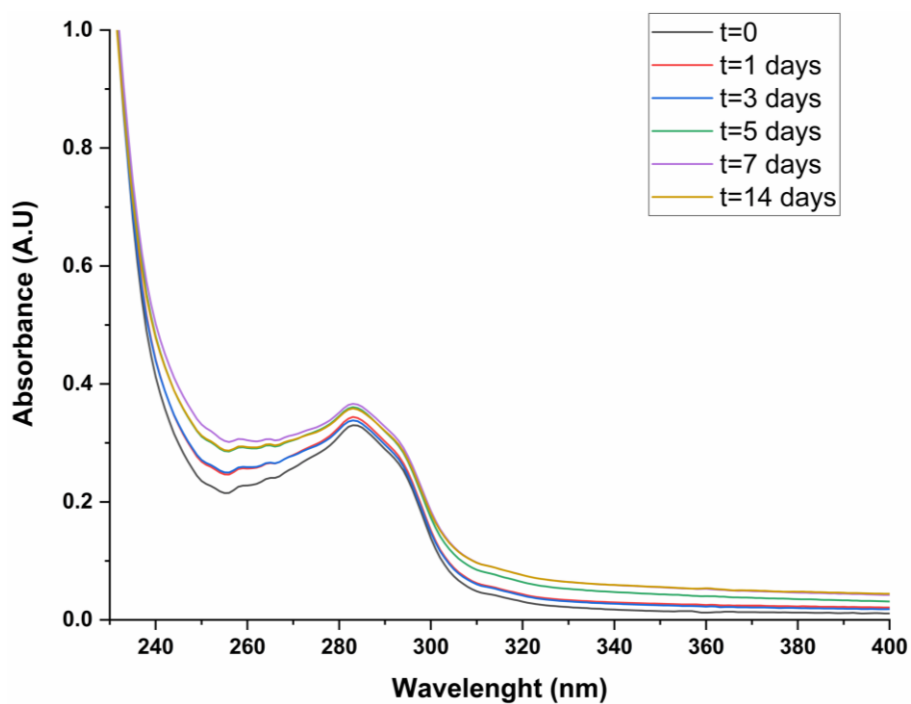

**Figure S14.** UV-Vis spectra stability studies of SMA-NR16 dissolved in NaCl aqueous solution, and stored at r.t. for 14 days. SMA-NR16 = 100  $\mu\text{g/mL}$ . Spectra were recorded scanning from 200 to 800 nm, using a 1 cm path length quartz cells.

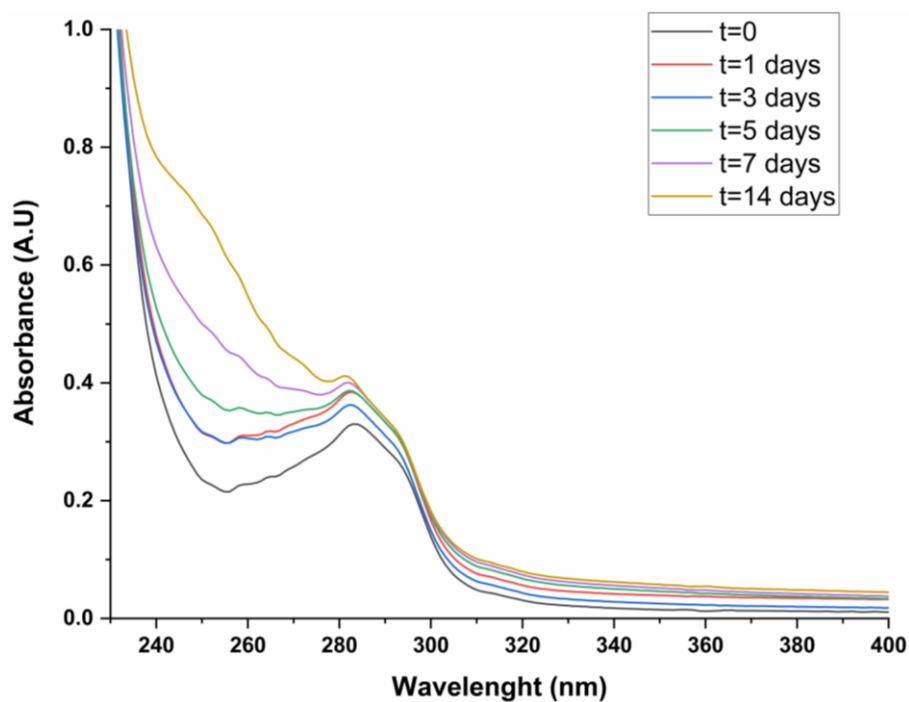

**Figure S15.** UV-Vis spectra stability studies of SMA-NR16 dissolved in NaCl aqueous solution, and stored at 37 °C for 14 days. SMA-NR16 = 100  $\mu\text{g/mL}$ . Spectra were recorded scanning from 200 to 800 nm, using a 1 cm path length quartz cells.



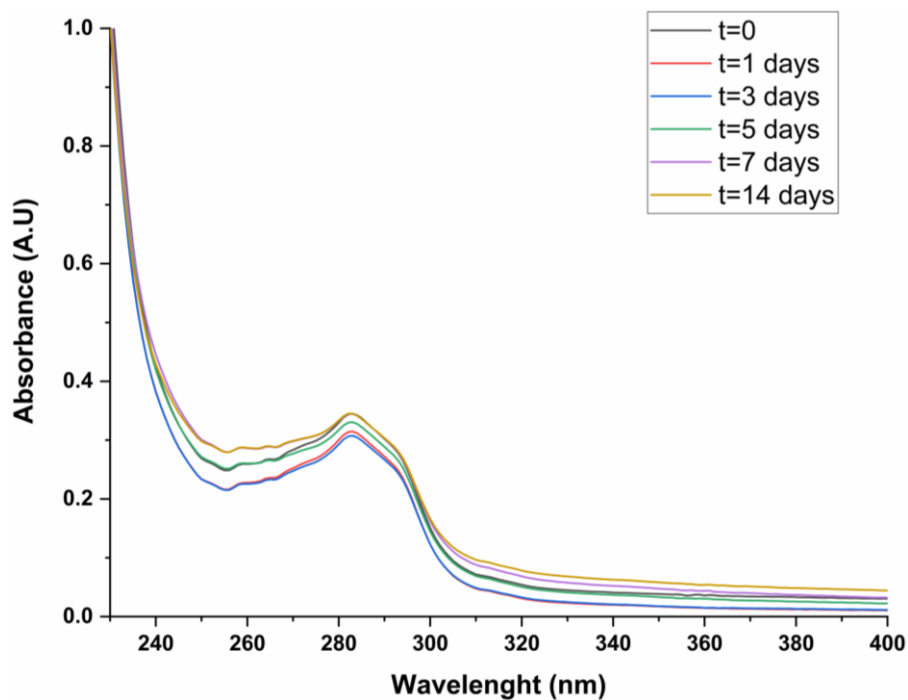

**Figure S16.** UV-Vis spectra stability studies of SMA-NR16 dissolved in PBS aqueous solution, and stored at 4 °C for 14 days. SMA-NR16 = 100  $\mu\text{g/mL}$ . Spectra were recorded scanning from 200 to 800 nm, using a 1 cm path length quartz cells.

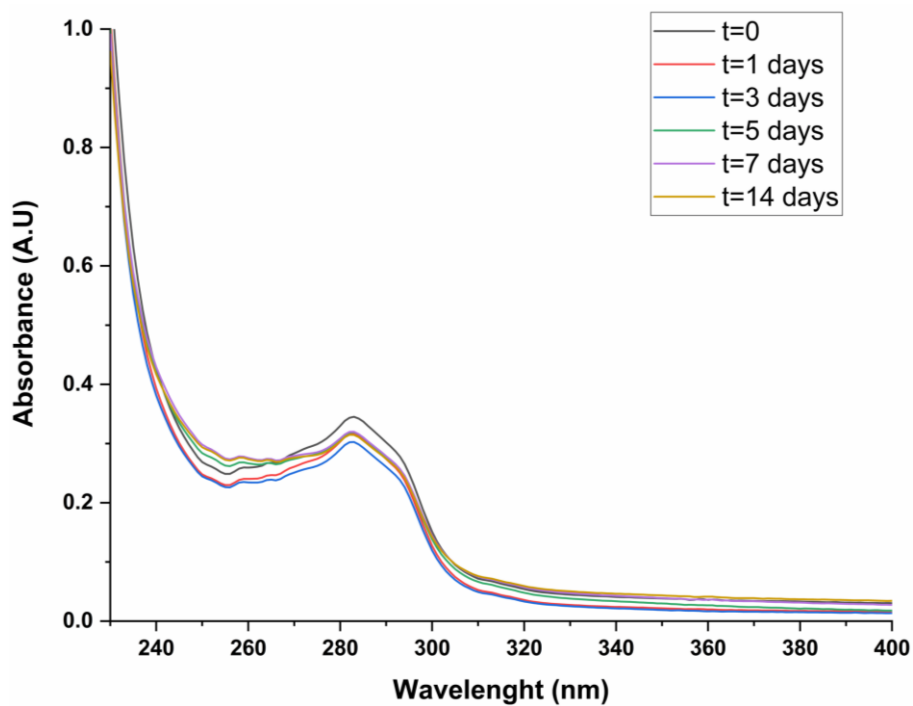

**Figure S17.** UV-Vis spectra stability studies of SMA-NR16 dissolved in PBS aqueous solution, and stored at r.t. for 14 days. SMA-NR16 = 100  $\mu\text{g/mL}$ . Spectra were recorded scanning from 200 to 800 nm, using a 1 cm path length quartz cells.

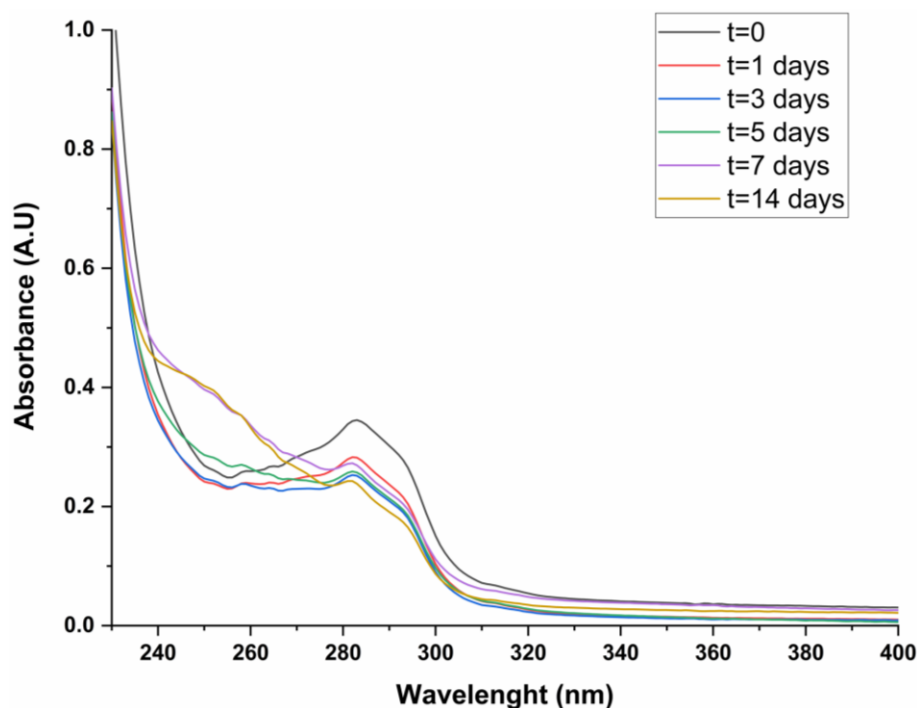

**Figure S18.** UV-Vis spectra stability studies of SMA-NR16 dissolved in PBS aqueous solution, and stored at 37 °C for 14 days. SMA-NR16 = 100  $\mu\text{g/mL}$ . Spectra were recorded scanning from 200 to 800 nm, using a 1 cm path length quartz cells.

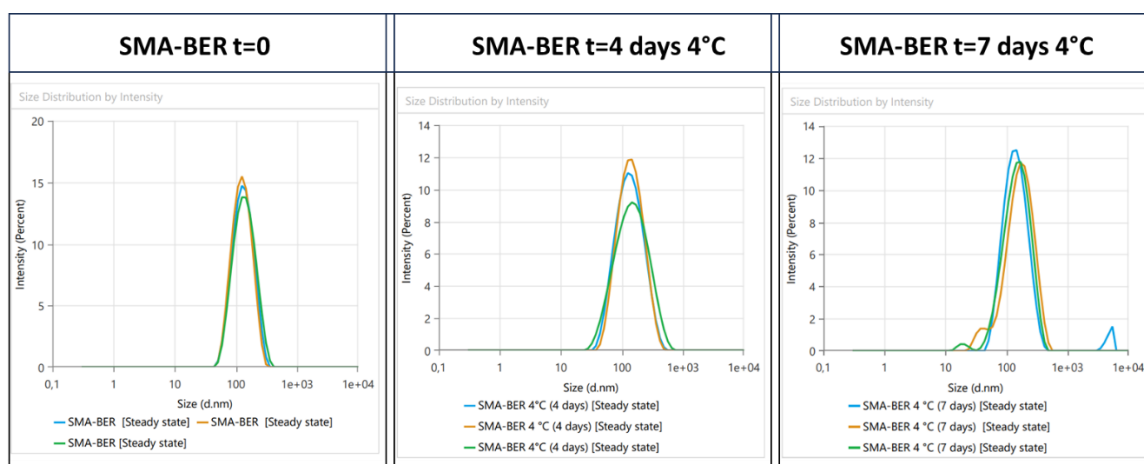

**Figure S19.** DLS stability study of SMA-BER solution in DDW (conc. 0.05  $\mu\text{g/mL}$ ) stored at 4  $^{\circ}\text{C}$  for 7 days.

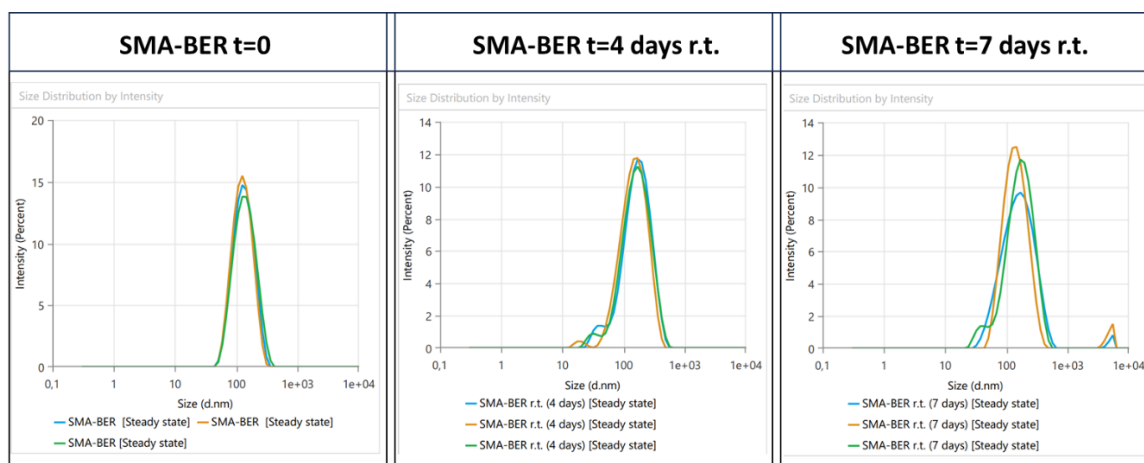

**Figure S20.** DLS stability study of SMA-BER solution in DDW (conc. 0.05  $\mu\text{g/mL}$ ) stored at r.t. for 7 days.

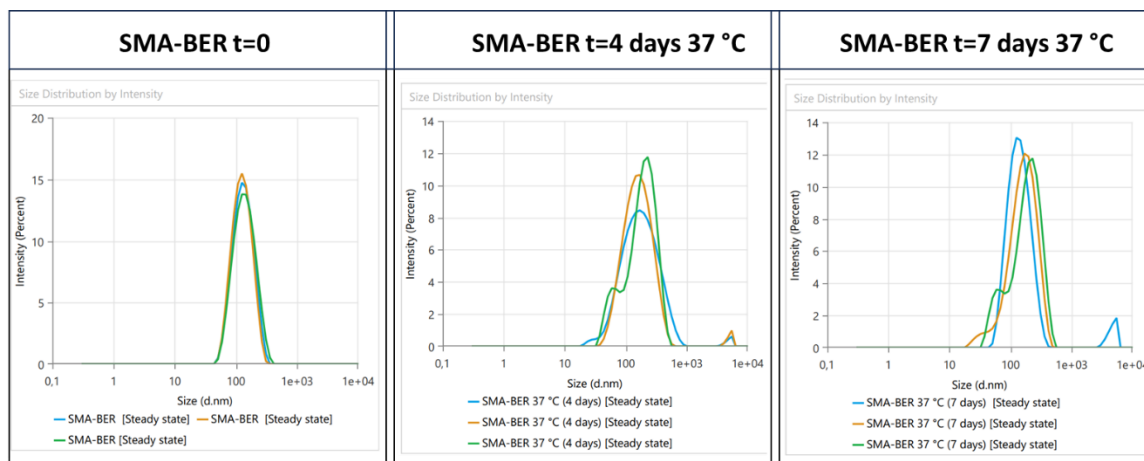

**Figure S21.** DLS stability study of SMA-BER solution in DDW (conc. 0.05  $\mu\text{g/mL}$ ) stored at 37 °C for 7 days.

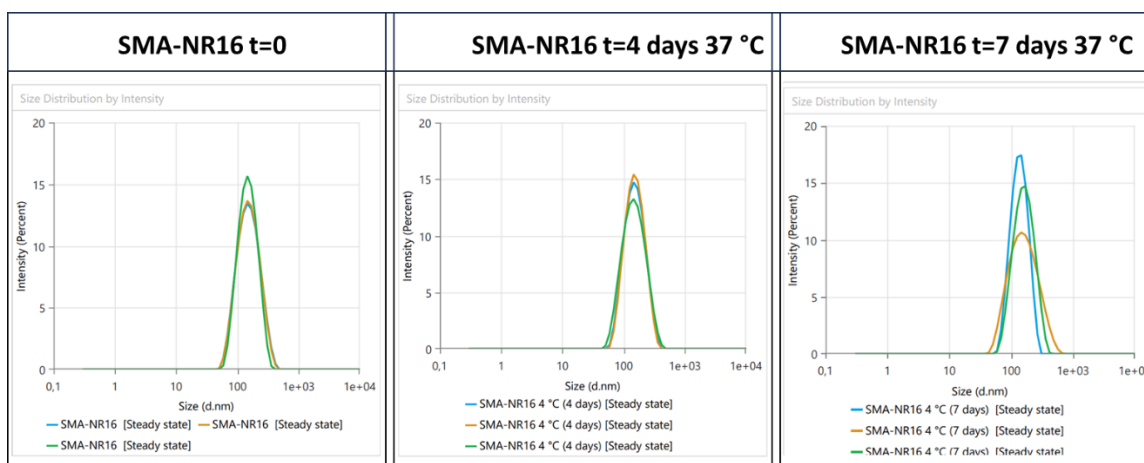

**Figure S22.** DLS stability study of SMA-NR16 solution in DDW (conc. 0.05  $\mu\text{g/mL}$ ) stored at 4 °C for 7 days.

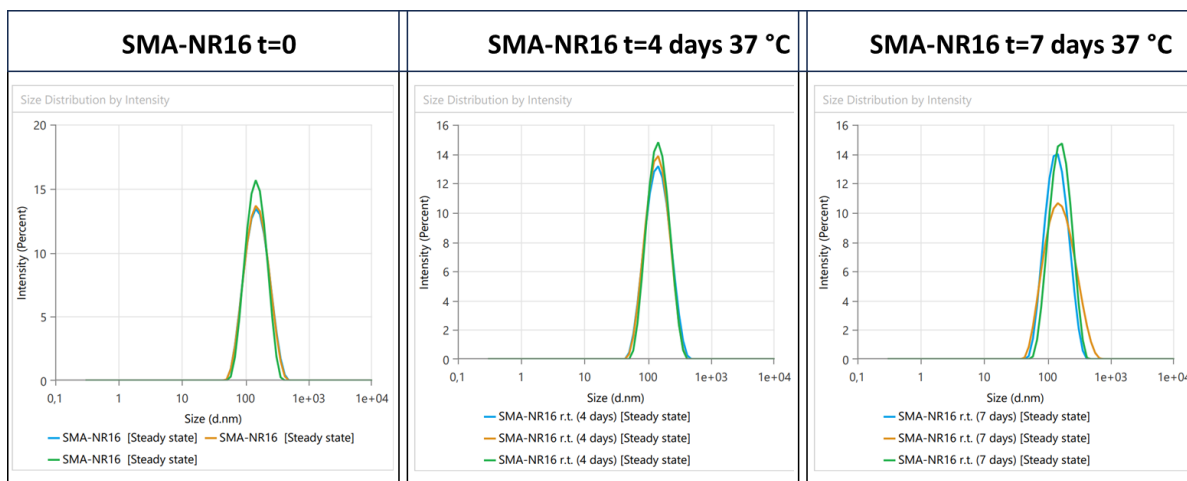

**Figure S23.** DLS stability study of SMA-NR16 solution in DDW (conc. 0.05  $\mu\text{g/mL}$ ) stored at r.t. for 7 days.

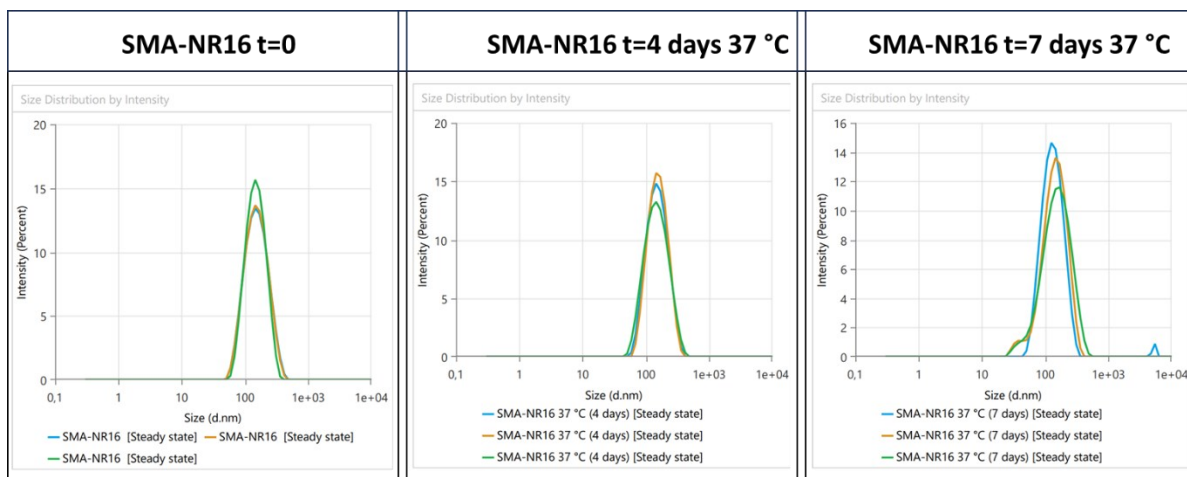

**Figure S24.** DLS stability study of SMA-NR16 solution in DDW (conc. 0.05  $\mu\text{g/mL}$ ) stored at 37 °C for 7 days.

## MIC and MBC raw data

### 1<sup>st</sup> Experimental set

| Strain                             | BER                |                    | SMA-BER <sup>[b]</sup> |      | NR1<br>6 |     | SMA-NR16 <sup>[b]</sup> |      | H-SMA |
|------------------------------------|--------------------|--------------------|------------------------|------|----------|-----|-------------------------|------|-------|
|                                    | MIC <sup>[a]</sup> | MBC <sup>[a]</sup> | MIC                    | MBC  | MIC      | MBC | MIC                     | MBC  | MIC   |
| <i>E. coli</i> ATCC 25922          | >512               | /                  | >512                   | /    | 256      | /   | 256                     | >512 | >512  |
| <i>K. pneumoniae</i> ATCC BAA-2814 | >512               | /                  | >512                   | /    | >512     | /   | >512                    | /    | >512  |
| <i>A. baumannii</i> ATCC 17978     | >512               | /                  | >512                   | /    | 256      | /   | >512                    | /    | >512  |
| <i>P. aeruginosa</i> ATCC 27853    | >512               | /                  | >512                   | /    | >512     | /   | >512                    | /    | >512  |
| VS <i>E. faecalis</i> ATCC 29219   | >512               | /                  | 256                    | >512 | 256      | 256 | >512                    | /    | >512  |
| VR <i>E. faecalis</i> ATCC 51299   | 64                 | >512               | 16                     | >512 | 32       | 256 | >512                    | /    | >512  |
| MS <i>S. aureus</i> ATCC 12598     | 256                | >512               | 128                    | 128  | 256      | 256 | >512                    | /    | >512  |
| MS <i>S. aureus</i> ATCC 25923     | 64                 | 64                 | 64                     | 64   | 128      | 128 | >512                    | /    | >512  |
| MR <i>S. aureus</i> USA 300        | 128                | >512               | 128                    | 128  | 256      | 256 | >512                    | /    | >512  |
| <i>S. epidermidis</i> ATCC 35984   | 32                 | 64                 | 64                     | 128  | 128      | 256 | >512                    | /    | >512  |
| <i>C. albicans</i> ATCC 10231      | 128                | 256                | 128                    | 256  | 256      | 256 | >512                    | /    | >512  |

<sup>a</sup>MIC and MBC values calculated as the geometric mean of three different tests and they are expressed as mg/L. <sup>b</sup>SMA-BER and SMA-NR16 concentrations are referred to the amount (mg) of encapsulated drug.

### 2<sup>nd</sup> Experimental set

| Strain                             | BER                |                    | SMA-BER <sup>[b]</sup> |      | NR16 |      | SMA-NR16 <sup>[b]</sup> |      | H-SMA |
|------------------------------------|--------------------|--------------------|------------------------|------|------|------|-------------------------|------|-------|
|                                    | MIC <sup>[a]</sup> | MBC <sup>[a]</sup> | MIC                    | MBC  | MIC  | MBC  | MIC                     | MBC  | MIC   |
| <i>E. coli</i> ATCC 25922          | >512               | /                  | >512                   | /    | 256  | >512 | 512                     | >512 | >512  |
| <i>K. pneumoniae</i> ATCC BAA-2814 | >512               | /                  | >512                   | /    | 256  | >512 | >512                    | /    | >512  |
| <i>A. baumannii</i> ATCC 17978     | >512               | /                  | >512                   | /    | 256  | >512 | >512                    | /    | >512  |
| <i>P. aeruginosa</i> ATCC 27853    | >512               | /                  | >512                   | /    | >512 | /    | >512                    | /    | >512  |
| VS <i>E. faecalis</i> ATCC 29219   | 512                | >512               | 128                    | >256 | 256  | 256  | >512                    | /    | >512  |
| VR <i>E. faecalis</i> ATCC 51299   | 128                | >512               | 32                     | >512 | 64   | 256  | >512                    | /    | >512  |
| MS <i>S. aureus</i> ATCC 12598     | 128                | >512               | 128                    | 128  | 256  | 256  | >512                    | /    | >512  |
| MS <i>S. aureus</i> ATCC 25923     | 64                 | 128                | 128                    | 128  | 128  | 128  | >512                    | /    | >512  |
| MR <i>S. aureus</i> USA 300        | 128                | >512               | 128                    | 128  | 256  | 256  | >512                    | /    | >512  |
| <i>S. epidermidis</i> ATCC 35984   | 32                 | 64                 | 128                    | 128  | 256  | 256  | >512                    | /    | >512  |
| <i>C. albicans</i> ATCC 10231      | 256                | 256                | 128                    | 256  | 256  | 512  | >512                    | /    | >512  |

<sup>a</sup>MIC and MBC values calculated as the geometric mean of three different tests and they are expressed as mg/L. <sup>b</sup>SMA-BER and SMA-NR16 concentrations are referred to the amount (mg) of encapsulated drug.

**3<sup>rd</sup> experimental set**

| Strain                             | BER                |                    | SMA-BER <sup>[b]</sup> |      | NR16 |      | SMA-NR16 <sup>[b]</sup> |      | H-SMA |
|------------------------------------|--------------------|--------------------|------------------------|------|------|------|-------------------------|------|-------|
|                                    | MIC <sup>[a]</sup> | MBC <sup>[a]</sup> | MIC                    | MBC  | MIC  | MBC  | MIC                     | MBC  | MIC   |
| <i>E. coli</i> ATCC 25922          | >512               | /                  | >512                   | /    | 256  | >512 | 512                     | >512 | >512  |
| <i>K. pneumoniae</i> ATCC BAA-2814 | >512               | /                  | >512                   | /    | 256  | >512 | >512                    | /    | >512  |
| <i>A. baumannii</i> ATCC 17978     | >512               | /                  | >512                   | /    | 256  | >512 | >512                    | /    | >512  |
| <i>P. aeruginosa</i> ATCC 27853    | >512               | /                  | >512                   | /    | >512 | /    | >512                    | /    | >512  |
| VS <i>E. faecalis</i> ATCC 29219   | 512                | >512               | 64                     | >512 | 256  | 256  | >512                    | /    | >512  |
| VR <i>E. faecalis</i> ATCC 51299   | 256                | >512               | 16                     | >512 | 128  | 256  | >512                    | /    | >512  |
| MS <i>S. aureus</i> ATCC 12598     | 128                | >512               | 64                     | 128  | 256  | 256  | >512                    | /    | >512  |
| MS <i>S. aureus</i> ATCC 25923     | 64                 | 64                 | 64                     | 64   | 128  | 256  | >512                    | /    | >512  |
| MR <i>S. aureus</i> USA 300        | 128                | >512               | 64                     | 128  | 256  | 256  | >512                    | /    | >512  |
| <i>S. epidermidis</i> ATCC 35984   | 32                 | 64                 | 64                     | 128  | 128  | 256  | >512                    | /    | >512  |
| <i>C. albicans</i> ATCC 10231      | 128                | 256                | 128                    | 256  | 256  | 256  | >512                    | /    | >512  |

<sup>a</sup>MIC and MBC values calculated as the geometric mean of three different tests and they are expressed as mg/L. <sup>b</sup>SMA-BER and SMA-NR16 concentrations are referred to the amount (mg) of encapsulated drug.
